# Supplementary material for: Functional analysis of microorganisms and metabolites in the cecum of different sheep populations and their effects on production traits
Source: Front Microbiol. 2024 Sep 16;15:1437250. doi: 10.3389/fmicb.2024.1437250 (PMC11439670; doi:10.3389/fmicb.2024.1437250)
Supplement: SUPPLEMENTARY TABLE S8 — Microbial KEGG classification. [file Table_8.xlsx]

## Sheet: Supplementary Table7.Microbial 
#Level1	Level2	Level3	MG_STH5	MG_STH1	STH6	MG_STH3	STH5	MG_STH4	STH3	MG_STH6	MG_STH2	STH4	STH2	STH1	Total
Metabolism	Global and overview maps	Metabolic pathways	2402196	2450606	3279216	2693808	2296196	2594558	3042384	2395334	2802242	3800184	3822152	2309544	33888420
Metabolism	Global and overview maps	Biosynthesis of secondary metabolites	1033500	1075004	1418400	1190422	936804	1117238	1308044	996994	1211618	1649460	1649524	963436	14550444
Metabolism	Global and overview maps	Microbial metabolism in diverse environments	599624	615942	841194	685568	541208	640908	880010	603990	709306	1002804	1007850	587594	8715998
Metabolism	Global and overview maps	Biosynthesis of amino acids	470772	511074	684862	582832	462548	511970	687160	481110	589120	819402	813868	484044	7098762
Metabolism	Global and overview maps	Biosynthesis of cofactors	408492	438762	571694	492590	434726	450192	640040	461376	521830	679310	688668	450592	6238272
Environmental Information Processing	Membrane transport	ABC transporters	374036	401798	515004	423348	289832	395936	348176	339448	429514	634478	607010	284348	5042928
Metabolism	Global and overview maps	Carbon metabolism	343176	346276	478152	382346	307938	369432	499742	344844	399644	563992	572400	333342	4941284
Metabolism	Nucleotide metabolism	Purine metabolism	235246	228306	308062	234124	228440	257462	249428	254736	260518	361158	348230	215272	3180982
Metabolism	Global and overview maps	Nucleotide metabolism	183638	179686	249482	187500	221220	202800	203378	223804	215632	295106	279822	196020	2638088
Genetic Information Processing	Translation	Aminoacyl-tRNA biosynthesis	204548	188880	291650	183492	162348	219836	209482	156616	192614	301482	325926	166944	2603818
Cellular Processes	Cellular community - prokaryotes	Quorum sensing	195370	200178	265964	213124	152712	210162	194244	177004	218756	305526	304474	153994	2591508
Genetic Information Processing	Replication and repair	Homologous recombination	170636	169698	240570	171504	258222	183908	256524	153526	186936	277080	274196	228664	2571464
Genetic Information Processing	Replication and repair	Mismatch repair	160622	163052	217126	170510	263846	176076	267632	166494	189158	252746	253356	233784	2514402
Metabolism	Nucleotide metabolism	Pyrimidine metabolism	171480	171356	225466	179030	216256	191232	195150	215038	205058	265882	253928	189850	2479726
Environmental Information Processing	Signal transduction	Two-component system	213740	191914	249640	176812	139600	223904	147082	152876	184308	265902	284512	131722	2362012
Metabolism	Energy metabolism	Methane metabolism	124660	140928	200422	176876	136210	138670	340350	180704	189382	242228	268064	175972	2314466
Genetic Information Processing	Replication and repair	DNA replication	133184	139062	190464	154016	259640	146224	266332	151878	172800	231816	226044	228122	2299582
Metabolism	Carbohydrate metabolism	Amino sugar and nucleotide sugar metabolism	176640	167262	232626	171346	172842	192032	171080	156152	179858	253492	262140	156678	2292148
Metabolism	Carbohydrate metabolism	Glycolysis / Gluconeogenesis	172810	165212	231240	166730	145458	184204	184400	149650	176824	264920	263348	146466	2251262
Metabolism	Carbohydrate metabolism	Starch and sucrose metabolism	171770	180788	218048	197506	156106	183644	146020	152956	196352	260356	243160	144258	2250964
Metabolism	Amino acid metabolism	Cysteine and methionine metabolism	137508	153784	210702	185546	161664	150324	220826	153542	187478	261614	249844	161650	2234482
Metabolism	Global and overview maps	Biosynthesis of nucleotide sugars	158546	157732	219982	169548	157290	171476	183026	154704	176506	244064	250176	150154	2193204
Metabolism	Amino acid metabolism	Alanine, aspartate and glutamate metabolism	167876	162828	190270	162344	125216	183554	160802	133640	167536	214646	218344	124162	2011218
Metabolism	Glycan biosynthesis and metabolism	Peptidoglycan biosynthesis	156020	145030	233248	139584	128030	167246	146490	124148	148962	236842	259456	125314	2010370
Metabolism	Carbohydrate metabolism	Pyruvate metabolism	152840	147372	195008	155522	118828	161634	181774	136726	161336	222996	226928	127092	1988056
Genetic Information Processing	Translation	Ribosome	136780	129320	179428	136688	110744	145594	152530	123766	142854	195640	206262	113958	1773564
Metabolism	Energy metabolism	Carbon fixation pathways in prokaryotes	123504	117600	159524	123174	103066	133032	153756	114034	131240	181570	186450	108458	1635408
Metabolism	Global and overview maps	2-Oxocarboxylic acid metabolism	94668	110620	138598	134182	99184	102740	159254	104162	131466	174836	170878	106540	1527128
Metabolism	Carbohydrate metabolism	Galactose metabolism	115428	115998	148436	122754	102498	126530	101414	102294	125950	170210	168348	95214	1495074
Metabolism	Metabolism of cofactors and vitamins	Porphyrin metabolism	72352	93110	115596	111038	97114	81158	169670	113632	120090	153526	151880	108546	1387712
Metabolism	Amino acid metabolism	Glycine, serine and threonine metabolism	101128	101358	132528	111222	89328	107690	123370	89866	111950	156214	155086	91544	1371284
Metabolism	Carbohydrate metabolism	Pentose phosphate pathway	95322	97476	139324	105476	87232	101812	110776	89152	109060	162758	160956	86572	1345916
Genetic Information Processing	Replication and repair	Nucleotide excision repair	92050	88230	124984	86790	94776	98734	100484	86676	94802	135566	138092	90046	1231230
Metabolism	Amino acid metabolism	Lysine biosynthesis	82332	83776	116784	87532	74888	89936	102582	75280	91444	132222	135214	77350	1149340
Cellular Processes	Cell growth and death	Cell cycle - Caulobacter	79242	75898	126068	77302	99484	84992	89212	65078	81378	141178	138954	89330	1148116
Metabolism	Amino acid metabolism	Phenylalanine, tyrosine and tryptophan biosynthesis	70134	81086	100632	100544	70264	76170	130860	85366	101584	124918	124244	79828	1145630
Genetic Information Processing	Folding, sorting and degradation	RNA degradation	85216	79906	120876	81424	79610	92352	84514	74074	88976	129598	134100	75816	1126462
Metabolism	Energy metabolism	Oxidative phosphorylation	72872	76276	105430	88510	87698	79640	89904	74962	90534	121868	119766	80508	1087968
Metabolism	Carbohydrate metabolism	Butanoate metabolism	85076	81254	100184	86736	63486	92290	102306	78042	90906	118768	117174	69866	1086088
Metabolism	Carbohydrate metabolism	Glyoxylate and dicarboxylate metabolism	87534	85710	95162	90956	64132	92258	95594	73138	92754	108286	109722	67252	1062498
Metabolism	Amino acid metabolism	Arginine biosynthesis	77960	77892	96310	83938	72614	85062	94900	69794	86384	116496	114650	71812	1047812
Metabolism	Carbohydrate metabolism	Fructose and mannose metabolism	75040	71028	106162	74408	76628	80320	70524	63804	76760	121096	119044	68700	1003514
Metabolism	Glycan biosynthesis and metabolism	O-Antigen nucleotide sugar biosynthesis	65162	68126	93480	80352	78276	71204	100400	73042	83006	101672	107750	76370	998840
Metabolism	Carbohydrate metabolism	Citrate cycle (TCA cycle)	75038	71604	91138	77126	59866	80530	105218	72224	82182	104524	106802	67404	993656
Metabolism	Metabolism of cofactors and vitamins	Nicotinate and nicotinamide metabolism	68982	72048	82954	82354	60222	76066	89856	88158	93768	99942	98228	62312	974890
Environmental Information Processing	Membrane transport	Bacterial secretion system	78544	70344	111460	69412	63942	80978	70256	55418	70484	112714	121712	60240	965504
Metabolism	Lipid metabolism	Glycerophospholipid metabolism	70618	71484	97070	75596	61926	76092	74410	68970	79882	104684	111268	60996	952996
Genetic Information Processing	Folding, sorting and degradation	Protein export	75710	69802	109022	70018	59506	80172	71692	56950	72330	108828	119182	58288	951500
Genetic Information Processing	Replication and repair	Base excision repair	57490	58220	91986	60178	78708	63398	82102	64232	66524	105170	104292	71750	904050
Metabolism	Metabolism of cofactors and vitamins	Pantothenate and CoA biosynthesis	54584	63188	80284	75500	58924	59728	97916	64786	77166	103398	98522	64020	898016
Metabolism	Energy metabolism	Carbon fixation in photosynthetic organisms	67034	64544	99710	66414	54106	71422	65946	55714	69112	110292	109908	54364	888566
Metabolism	Metabolism of cofactors and vitamins	One carbon pool by folate	60006	58868	88112	62204	70260	64742	60398	53838	65524	102264	96170	61564	843950
Metabolism	Glycan biosynthesis and metabolism	Teichoic acid biosynthesis	51932	61428	80874	72520	59912	56880	70390	63814	74682	93984	93498	59044	838958
Metabolism	Metabolism of cofactors and vitamins	Thiamine metabolism	57280	57510	86130	61066	57432	63448	73850	53484	62808	95190	99942	57156	825296
Metabolism	Carbohydrate metabolism	Propanoate metabolism	59996	58244	80716	63924	50930	62808	71156	52362	64576	96060	93688	52346	806806
Metabolism	Lipid metabolism	Glycerolipid metabolism	55448	58238	85288	62194	54988	59250	54174	47938	62978	96696	96656	51874	785722
Metabolism	Energy metabolism	Sulfur metabolism	41058	46166	72936	54202	49742	44072	82790	48516	54730	97198	88136	54648	734194
Human Diseases	Drug resistance: antimicrobial	beta-Lactam resistance	60278	56612	85720	50968	51436	64470	34150	46776	55240	91096	90938	43654	731338
Metabolism	Metabolism of other amino acids	D-Amino acid metabolism	51014	54134	72918	59600	48868	55728	60018	49832	60834	85738	83716	48380	730780
Metabolism	Amino acid metabolism	Valine, leucine and isoleucine biosynthesis	40616	50618	65906	64974	41228	43972	76352	47998	61384	85080	82398	46790	707316
Metabolism	Carbohydrate metabolism	Pentose and glucuronate interconversions	58266	53932	71302	56252	39142	59678	51980	48724	58034	78612	83554	39756	699232
Metabolism	Global and overview maps	Fatty acid metabolism	57358	51974	72114	56488	43012	61050	52590	43820	56366	78746	81072	43166	697756
Metabolism	Energy metabolism	Nitrogen metabolism	55058	53456	64900	52642	47194	58332	54988	45522	55860	80762	74352	45634	688700
Metabolism	Metabolism of cofactors and vitamins	Folate biosynthesis	40054	43834	60274	54180	54638	43636	74340	54202	57686	74624	74234	54770	686472
Metabolism	Metabolism of terpenoids and polyketides	Terpenoid backbone biosynthesis	47656	49006	69378	55294	41446	51854	63910	47738	56628	79238	80716	43322	686186
Metabolism	Xenobiotics biodegradation and metabolism	Drug metabolism - other enzymes	49054	46448	65914	47150	57802	54534	52154	43740	51984	77494	72182	51002	669458
Human Diseases	Drug resistance: antimicrobial	Vancomycin resistance	47480	46438	74646	45860	41480	51272	48048	39934	48186	80492	83632	40624	648092
Metabolism	Metabolism of other amino acids	Selenocompound metabolism	41966	43740	61766	51280	40544	44602	57676	41992	51990	72594	72128	42456	622734
Metabolism	Amino acid metabolism	Histidine metabolism	38182	41968	63710	48410	35904	41360	68526	39652	48834	77274	75208	41684	620712
Metabolism	Lipid metabolism	Fatty acid biosynthesis	51362	45816	64888	47854	38294	55074	39620	36906	48200	68108	71500	36710	604332
Genetic Information Processing	Transcription	RNA polymerase	40036	38664	51918	40314	42286	45970	48136	59554	47588	56668	58906	41226	571266
Metabolism	Amino acid metabolism	Arginine and proline metabolism	39216	40546	54468	46582	35202	40170	52410	38650	46798	64680	64302	36992	560016
Environmental Information Processing	Membrane transport	Phosphotransferase system (PTS)	34350	38400	53384	41942	37654	32900	43722	41450	45392	78210	63042	37708	548154
Metabolism	Biosynthesis of other secondary metabolites	Streptomycin biosynthesis	35710	38110	56614	41754	32718	39396	50400	36556	43496	62906	64710	35244	537614
Genetic Information Processing	Folding, sorting and degradation	Sulfur relay system	31700	35288	48172	39594	40258	33984	46990	35144	39980	58742	58548	38714	507114
Cellular Processes	Cellular community - prokaryotes	Biofilm formation - Escherichia coli	46150	43064	47302	42938	33320	45740	31404	34018	42898	56534	52800	30610	506778
Human Diseases	Drug resistance: antimicrobial	Cationic antimicrobial peptide (CAMP) resistance	36696	33292	50198	33820	49022	37404	24974	30068	35518	54940	52692	37692	476316
Cellular Processes	Cell growth and death	Necroptosis	42490	40546	44794	37118	29190	46346	31442	30558	38826	49934	50094	27976	469314
Metabolism	Lipid metabolism	Fatty acid degradation	38386	37916	43700	41834	26890	40336	38594	30782	40410	47572	49606	28692	464718
Metabolism	Amino acid metabolism	Phenylalanine metabolism	31132	31602	35566	36380	30576	32378	48200	31144	37282	46512	43944	32478	437194
Metabolism	Metabolism of other amino acids	Cyanoamino acid metabolism	32584	30488	46820	30892	27342	36074	29826	25250	32154	51232	51046	26782	420490
Organismal Systems	Endocrine system	Glucagon signaling pathway	30454	31614	41146	34660	30454	32436	29332	26676	33782	49126	46916	28436	415032
Metabolism	Biosynthesis of other secondary metabolites	Monobactam biosynthesis	27464	28224	39976	30460	26944	29184	35512	26734	31424	47310	46412	27792	397436
Metabolism	Lipid metabolism	Sphingolipid metabolism	42204	33972	46244	30188	22148	47830	16426	22784	31676	35980	46642	19402	395496
Metabolism	Carbohydrate metabolism	C5-Branched dibasic acid metabolism	21158	27274	33660	36472	22462	23108	49318	29790	35404	44014	43858	27322	393840
Environmental Information Processing	Signal transduction	HIF-1 signaling pathway	25840	26452	43474	29604	27786	27942	30758	22910	29200	52286	49756	26896	392904
Cellular Processes	Transport and catabolism	Peroxisome	31026	31264	35580	36570	24728	33130	32992	26140	35090	36092	39964	25562	388138
Metabolism	Biosynthesis of other secondary metabolites	Biosynthesis of various plant secondary metabolites	28364	27724	40748	29154	27978	31176	28138	25558	31096	42828	44328	26250	383342
Organismal Systems	Aging	Longevity regulating pathway - worm	25964	25494	33830	27154	35242	28862	32050	26292	31022	41302	37988	31660	376860
Metabolism	Glycan biosynthesis and metabolism	Other glycan degradation	44760	30390	48566	21734	21248	50994	9638	18342	24884	32434	47194	16736	366920
Metabolism	Amino acid metabolism	Valine, leucine and isoleucine degradation	24404	25216	30694	32088	21262	25526	38930	24766	31544	40252	36990	23780	355452
Metabolism	Energy metabolism	Photosynthesis	26422	25058	32544	26184	34942	27920	24298	22318	26956	39298	36382	28894	351216
Organismal Systems	Endocrine system	PPAR signaling pathway	28976	27308	35318	30054	22614	31110	27254	22580	29552	34082	38266	22486	349600
Metabolism	Amino acid metabolism	Tyrosine metabolism	23902	24556	29396	28094	22088	24646	35638	23734	28292	37028	36096	23950	337420
Metabolism	Metabolism of cofactors and vitamins	Biotin metabolism	26744	24784	34954	24616	22430	28948	26976	22778	27006	36380	39214	22324	337154
Cellular Processes	Cellular community - prokaryotes	Biofilm formation - Vibrio cholerae	25642	26236	27578	28922	18564	26956	33432	24600	29352	32414	34286	20720	328702
Metabolism	Metabolism of cofactors and vitamins	Riboflavin metabolism	19736	21754	30842	25570	22804	20704	35006	23612	26640	37324	37660	24074	325726
Metabolism	Glycan biosynthesis and metabolism	Exopolysaccharide biosynthesis	26046	27244	36016	29358	17178	27272	19990	19592	27998	35886	39250	16962	322792
Human Diseases	Infectious disease: bacterial	Tuberculosis	24502	23558	28750	23126	24352	27242	27862	23012	26616	33342	33368	23194	318924
Human Diseases	Endocrine and metabolic disease	Insulin resistance	26354	25880	29722	24812	19668	28224	23124	21284	25528	32678	33952	19414	310640
Cellular Processes	Cell motility	Flagellar assembly	36766	31054	25056	24824	19010	36300	14932	23318	26986	25058	26066	16488	305858
Metabolism	Biosynthesis of other secondary metabolites	Novobiocin biosynthesis	18034	20670	27006	25938	19784	19894	35534	21930	25678	34398	33378	21960	304204
Human Diseases	Cancer: overview	Central carbon metabolism in cancer	20252	22258	29426	27606	22284	21686	22218	20130	26016	36716	34324	20972	303888
Human Diseases	Cancer: overview	MicroRNAs in cancer	14860	17074	30060	22600	31750	16858	29546	19774	23630	37138	33518	26232	303040
Metabolism	Metabolism of terpenoids and polyketides	Polyketide sugar unit biosynthesis	17670	20290	29398	25330	19150	19544	31774	23688	25912	33962	34380	21352	302450
Organismal Systems	Environmental adaptation	Plant-pathogen interaction	24600	21708	31020	19192	24332	26762	16298	17262	20566	33294	32554	20448	288036
Metabolism	Amino acid metabolism	Lysine degradation	20372	18518	24442	23728	15218	20358	31318	20274	24452	32768	29320	17928	278696
Organismal Systems	Environmental adaptation	Thermogenesis	23940	23668	25718	27600	16858	25672	20338	18076	25798	23426	28004	17158	276256
Metabolism	Metabolism of other amino acids	Glutathione metabolism	21796	21770	19448	27972	17112	21712	25174	21562	27186	26476	24514	18326	273048
Cellular Processes	Cell growth and death	Ferroptosis	23668	22372	26480	25198	16450	25058	19272	17160	23908	24056	28748	16506	268876
Organismal Systems	Endocrine system	Adipocytokine signaling pathway	23704	22400	26018	24708	16546	25380	19198	16700	23346	22400	27930	16438	264768
Human Diseases	Infectious disease: bacterial	Epithelial cell signaling in Helicobacter pylori infection	17156	18572	27054	19074	15250	18982	24626	18558	20400	28588	30924	16524	255708
Human Diseases	Cardiovascular disease	Diabetic cardiomyopathy	20406	19570	24008	19570	15034	22038	22524	19166	21254	27746	28596	15790	255702
Human Diseases	Drug resistance: antineoplastic	Antifolate resistance	17474	16174	26362	17664	22556	18866	22292	15400	18066	30502	29106	20478	254940
Organismal Systems	Nervous system	GABAergic synapse	23320	22018	20728	20344	14378	25886	16618	17542	21848	23614	23918	13810	244024
Metabolism	Metabolism of cofactors and vitamins	Vitamin B6 metabolism	16606	18138	24504	21526	15486	18730	21958	15216	20214	27750	28012	15536	243676
Human Diseases	Infectious disease: bacterial	Legionellosis	18464	17986	21430	21608	19878	20116	15378	18836	23032	23012	23434	17070	240244
Metabolism	Biosynthesis of other secondary metabolites	Tropane, piperidine and pyridine alkaloid biosynthesis	14602	15716	20890	19000	16374	15404	27500	16010	19024	26976	25844	17764	235104
Organismal Systems	Nervous system	Glutamatergic synapse	22516	20752	20472	18172	14258	25036	16144	16526	20070	23392	23584	13630	234552
Human Diseases	Infectious disease: bacterial	Salmonella infection	19834	18258	26332	16626	14284	21146	14400	14016	17474	27020	28684	13336	231410
Genetic Information Processing	Translation	Ribosome biogenesis in eukaryotes	8728	12388	16406	18926	12690	10468	41274	22216	20326	19848	23882	19300	226452
Metabolism	Carbohydrate metabolism	Ascorbate and aldarate metabolism	18464	16712	23212	18408	9376	17924	20710	16222	18560	26294	26666	11590	224138
Human Diseases	Cardiovascular disease	Lipid and atherosclerosis	16512	15746	22040	16534	19904	18286	14616	15642	18878	24554	24078	16854	223644
Cellular Processes	Cell motility	Bacterial chemotaxis	23462	21456	20688	17068	12058	24790	11544	14906	16936	25044	23514	11004	222470
Metabolism	Xenobiotics biodegradation and metabolism	Benzoate degradation	17402	16582	19750	18860	11848	18472	21878	15552	19122	23500	23006	13614	219586
Metabolism	Amino acid metabolism	Tryptophan metabolism	14510	14372	18908	19168	12858	15254	25538	15618	19134	25554	23086	15102	219102
Human Diseases	Cardiovascular disease	Fluid shear stress and atherosclerosis	16382	15120	23106	15060	12512	17556	17690	12008	15480	23654	25882	13134	207584
Metabolism	Metabolism of other amino acids	Taurine and hypotaurine metabolism	16298	15790	23376	16164	12270	17726	13266	13302	16604	25190	25982	11540	207508
Metabolism	Metabolism of other amino acids	beta-Alanine metabolism	12974	14032	16640	17194	12598	13622	23766	16380	18026	23742	20684	14122	203780
Organismal Systems	Endocrine system	Insulin signaling pathway	16634	16432	17838	15506	14712	17588	13012	12690	15674	19692	19468	13372	192618
Genetic Information Processing	Folding, sorting and degradation	Protein processing in endoplasmic reticulum	13092	13652	17698	16264	12584	14592	18548	16114	16546	18982	20700	13320	192092
Cellular Processes	Cellular community - prokaryotes	Biofilm formation - Pseudomonas aeruginosa	14706	17022	13444	21656	11440	14780	18114	14938	20250	15552	16248	12392	190542
Metabolism	Glycan biosynthesis and metabolism	Glycosphingolipid biosynthesis - globo and isoglobo series	18002	14654	21914	14450	11556	20528	9718	10294	14490	18548	22704	10290	187148
Metabolism	Biosynthesis of other secondary metabolites	Acarbose and validamycin biosynthesis	11666	13260	18268	16256	10622	12420	19490	13018	16086	21028	21522	12332	185968
Metabolism	Global and overview maps	Degradation of aromatic compounds	15272	15874	14434	18374	10092	14218	15030	13450	17504	17312	16854	10794	179208
Organismal Systems	Immune system	NOD-like receptor signaling pathway	14544	13900	18380	12868	13068	15888	13198	12558	14382	18092	20258	12006	179142
Metabolism	Metabolism of terpenoids and polyketides	Biosynthesis of ansamycins	13336	13318	19360	12962	11490	14472	12770	11718	13830	22012	21138	10954	177360
Metabolism	Carbohydrate metabolism	Inositol phosphate metabolism	11708	12690	17928	13088	11314	12692	14656	11630	14098	18952	20528	11690	170974
Metabolism	Xenobiotics biodegradation and metabolism	Chloroalkane and chloroalkene degradation	11620	12046	15806	11870	10460	12476	11896	9962	12528	19846	18228	10430	157168
Organismal Systems	Aging	Longevity regulating pathway - multiple species	13642	12942	16748	13684	8262	14410	8400	9248	13198	16974	17840	8010	153358
Metabolism	Biosynthesis of other secondary metabolites	Isoquinoline alkaloid biosynthesis	9240	10078	13116	12254	10670	9774	16112	10308	12508	17350	16092	11198	148700
Human Diseases	Cancer: overview	Viral carcinogenesis	8152	10006	10844	12970	10340	9414	15352	13700	13868	12744	13996	10886	142272
Human Diseases	Infectious disease: bacterial	Staphylococcus aureus infection	7378	11168	9254	15860	9962	7936	16154	12256	14800	13424	11952	11074	141218
Metabolism	Biosynthesis of other secondary metabolites	Prodigiosin biosynthesis	11932	10288	15654	9116	9352	13114	8156	8406	10018	16480	17588	8302	138406
Cellular Processes	Transport and catabolism	Lysosome	18864	11090	20688	6830	5798	22262	2740	6230	8204	11082	18686	4672	137146
Metabolism	Biosynthesis of other secondary metabolites	Glucosinolate biosynthesis	8488	9974	13562	11564	7402	9398	12434	9368	11686	16702	15896	7938	134412
Metabolism	Glycan biosynthesis and metabolism	Glycosaminoglycan degradation	15586	11030	17180	8396	6988	18212	3988	8158	9546	11004	15758	5734	131580
Metabolism	Xenobiotics biodegradation and metabolism	Nitrotoluene degradation	8194	8124	10718	9352	8244	8568	18286	10834	10550	13628	13846	9994	130338
Human Diseases	Neurodegenerative disease	Spinocerebellar ataxia	3124	6320	4636	12884	12748	5092	18580	20720	15978	7496	7252	11690	126520
Human Diseases	Cancer: overview	Pathways in cancer	10090	9778	13480	9384	7330	10800	9028	7056	9560	14664	14892	7514	123576
Human Diseases	Endocrine and metabolic disease	Type I diabetes mellitus	7622	7790	8760	9884	13404	8468	6426	9158	11376	10960	9612	10222	113682
Metabolism	Glycan biosynthesis and metabolism	Lipopolysaccharide biosynthesis	20696	11510	12706	8654	4218	18674	1682	7730	8780	5360	9978	3142	113130
Human Diseases	Infectious disease: viral	Human papillomavirus infection	7260	8262	9630	9818	8520	8042	8438	9236	9966	10890	11512	7938	109512
Metabolism	Metabolism of cofactors and vitamins	Ubiquinone and other terpenoid-quinone biosynthesis	11326	9762	9412	9104	6726	11820	7766	8428	9870	8852	9396	6720	109182
Environmental Information Processing	Signal transduction	PI3K-Akt signaling pathway	9336	8680	12772	7986	6322	10356	7120	6772	8418	11686	13406	6200	109054
Human Diseases	Endocrine and metabolic disease	Type II diabetes mellitus	7156	7938	9478	9354	8118	7806	7560	8464	9410	10606	11112	7462	104464
Human Diseases	Infectious disease: viral	Coronavirus disease - COVID-19	3262	5550	6552	9306	5436	3902	19672	10752	9960	8382	10484	8532	101790
Environmental Information Processing	Signal transduction	MAPK signaling pathway - plant	7148	7572	8634	7940	4990	8044	11936	8726	9130	9358	10970	6180	100628
Human Diseases	Neurodegenerative disease	Alzheimer disease	7258	7238	10134	7294	6188	7990	8766	6346	7642	12230	11922	6296	99304
Human Diseases	Drug resistance: antineoplastic	Platinum drug resistance	6600	7428	7364	9084	4534	7666	10750	11244	10170	8006	9510	5596	97952
Organismal Systems	Endocrine system	Estrogen signaling pathway	7910	7596	11284	7448	5446	8744	5960	5632	7568	11410	12024	5364	96386
Organismal Systems	Immune system	Antigen processing and presentation	7910	7596	11232	7448	5340	8744	5960	5632	7568	11380	11966	5312	96088
Environmental Information Processing	Signal transduction	AMPK signaling pathway	6816	6448	8752	7000	7152	7288	10684	6588	7470	9872	10414	7498	95982
Human Diseases	Cancer: overview	Chemical carcinogenesis - receptor activation	8402	7820	10914	7082	5460	9128	5936	5776	7472	10798	11590	5352	95730
Human Diseases	Cancer: specific types	Prostate cancer	7968	7612	10900	6900	5446	8860	5892	5616	7244	10786	11570	5342	94136
Organismal Systems	Digestive system	Mineral absorption	6208	6878	7890	7522	4906	7094	11358	8154	8570	8988	10352	6070	93990
Organismal Systems	Immune system	Th17 cell differentiation	7974	7620	10848	6900	5354	8862	5900	5620	7246	10760	11512	5300	93896
Organismal Systems	Immune system	IL-17 signaling pathway	7968	7612	10848	6900	5340	8860	5892	5616	7244	10756	11512	5290	93838
Organismal Systems	Endocrine system	Progesterone-mediated oocyte maturation	7900	7346	10900	6824	5440	8730	5892	5616	7204	10786	11570	5340	93548
Metabolism	Biosynthesis of other secondary metabolites	Carbapenem biosynthesis	6334	7156	9520	8598	5442	6500	6914	4626	7478	10822	11116	5504	90010
Environmental Information Processing	Signal transduction	Phosphatidylinositol signaling system	7328	7530	9940	7760	5200	7488	5312	5412	7468	10068	11274	4974	89754
Metabolism	Metabolism of terpenoids and polyketides	Biosynthesis of vancomycin group antibiotics	4692	5626	9558	7250	5274	5228	9528	5334	6980	11694	11142	6044	88350
Organismal Systems	Digestive system	Carbohydrate digestion and absorption	7768	9608	5410	11984	4452	7942	5060	5934	10320	5858	5268	4388	83992
Organismal Systems	Digestive system	Pancreatic secretion	7598	9438	5308	11942	4446	7766	5060	5980	10310	5840	5196	4382	83266
Organismal Systems	Digestive system	Salivary secretion	7596	9430	5308	11926	4446	7758	5060	5916	10282	5840	5196	4382	83140
Metabolism	Metabolism of other amino acids	Phosphonate and phosphinate metabolism	5614	7328	5418	10978	4008	5948	7806	8936	10308	5620	6512	4552	83028
Human Diseases	Neurodegenerative disease	Huntington disease	4968	4856	4760	5808	4294	6460	4136	20502	8926	6236	5382	4112	80440
Human Diseases	Infectious disease: bacterial	Pathogenic Escherichia coli infection	6224	6082	8668	5966	5098	6672	5566	4934	6184	10374	9842	4804	80414
Human Diseases	Cancer: overview	Proteoglycans in cancer	5372	5680	7628	5998	5306	5742	8142	6026	6500	8514	8940	5960	79808
Metabolism	Biosynthesis of other secondary metabolites	Phenazine biosynthesis	3494	5400	6038	8030	4676	3816	11678	6458	7778	7912	7940	5938	79158
Metabolism	Metabolism of terpenoids and polyketides	Zeatin biosynthesis	6306	5826	10196	5398	4748	6962	4778	4212	5764	9408	10628	4510	78736
Metabolism	Biosynthesis of other secondary metabolites	Neomycin, kanamycin and gentamicin biosynthesis	6688	5928	9628	4260	4052	7578	3990	5620	5520	9774	10122	3790	76950
Genetic Information Processing	Transcription	Basal transcription factors	3398	4520	4980	5614	5146	4142	10046	7702	6984	7296	7150	6188	73166
Human Diseases	Neurodegenerative disease	Parkinson disease	5008	4882	8350	4662	4842	5644	6346	4538	5196	8178	9654	4762	72062
Human Diseases	Neurodegenerative disease	Pathways of neurodegeneration - multiple diseases	4844	5612	5222	6716	4674	5414	8162	5316	6372	6936	6906	5218	71392
Human Diseases	Immune disease	Primary immunodeficiency	4008	4212	7864	4920	6218	4360	4988	4916	5438	9758	9128	5408	71218
Metabolism	Xenobiotics biodegradation and metabolism	Naphthalene degradation	6752	6736	6458	6092	4122	6646	2574	4204	5844	7436	7216	3630	67710
Human Diseases	Neurodegenerative disease	Amyotrophic lateral sclerosis	4418	4868	4736	6338	4350	4876	8004	5146	6080	6512	6386	5018	66732
Human Diseases	Infectious disease: parasitic	Amoebiasis	6422	6248	6608	4656	4910	6636	2728	3916	4810	6980	7394	4182	65490
Human Diseases	Infectious disease: bacterial	Bacterial invasion of epithelial cells	4938	6266	1760	8190	4862	4680	5192	8646	9418	3008	2558	4828	64346
Organismal Systems	Endocrine system	Prolactin signaling pathway	4938	5358	6130	5296	4312	5214	3388	3524	5038	7958	7388	3824	62368
Organismal Systems	Endocrine system	Thyroid hormone signaling pathway	4760	4544	6014	4528	5080	5276	3576	4454	4950	7282	6604	4546	61614
Metabolism	Xenobiotics biodegradation and metabolism	Aminobenzoate degradation	4132	4048	5050	4366	4218	3998	6246	4298	4848	7626	6518	4634	59982
Metabolism	Glycan biosynthesis and metabolism	Arabinogalactan biosynthesis - Mycobacterium	4068	4502	6406	6174	3482	4344	4288	3660	5646	6936	6960	3346	59812
Metabolism	Metabolism of terpenoids and polyketides	Limonene and pinene degradation	3686	3866	5808	5058	2274	3880	4636	3850	5302	8026	6596	2844	55826
Metabolism	Lipid metabolism	Secondary bile acid biosynthesis	3530	2588	7192	2052	3686	3882	3432	2550	2534	8244	8206	3470	51366
Metabolism	Biosynthesis of other secondary metabolites	Biosynthesis of various antibiotics	3390	4528	3190	6598	2532	3840	5092	5240	5924	3718	3982	2968	51002
Organismal Systems	Endocrine system	Thyroid hormone synthesis	3278	3722	2848	5040	3262	3222	6196	4464	5106	4752	3900	3786	49576
Human Diseases	Cancer: overview	Chemical carcinogenesis - reactive oxygen species	4668	4016	3740	3648	3504	4950	4170	3548	4010	4264	4260	3498	48276
Human Diseases	Infectious disease: bacterial	Yersinia infection	3756	4684	978	5882	3386	3564	4252	7238	7398	1674	1638	3622	48072
Human Diseases	Infectious disease: bacterial	Pertussis	7120	4098	3916	3188	7130	6008	290	2796	3256	1972	2834	4498	47106
Metabolism	Glycan biosynthesis and metabolism	Various types of N-glycan biosynthesis	6920	2994	7574	1782	2682	8314	890	1858	2252	3098	6438	1924	46726
Metabolism	Glycan biosynthesis and metabolism	Glycosphingolipid biosynthesis - ganglio series	6838	2980	7552	1776	2680	8256	890	1846	2254	3102	6434	1920	46528
Metabolism	Glycan biosynthesis and metabolism	O-Antigen repeat unit biosynthesis	3154	3316	5678	3928	3182	3250	2720	2790	3916	5624	6024	2746	46328
Human Diseases	Endocrine and metabolic disease	Alcoholic liver disease	2584	2734	5664	2700	2364	2988	4334	2640	3060	7784	6462	2784	46098
Metabolism	Xenobiotics biodegradation and metabolism	Styrene degradation	2916	3132	3346	3190	4062	3444	4876	2812	3472	5046	4156	3968	44420
Metabolism	Xenobiotics biodegradation and metabolism	Caprolactam degradation	2524	3400	2708	6130	1860	2204	5876	3042	4990	3748	3684	2916	43082
Genetic Information Processing	Folding, sorting and degradation	Proteasome	1176	2230	2024	4046	1786	1622	8768	5824	4800	2916	3734	3214	42140
Metabolism	Metabolism of terpenoids and polyketides	Insect hormone biosynthesis	2070	2050	5418	2282	2140	2500	4268	2388	2748	7500	6130	2586	42080
Metabolism	Metabolism of cofactors and vitamins	Lipoic acid metabolism	3284	3364	3760	3638	2538	3450	2730	2968	3930	4202	3896	2330	40090
Organismal Systems	Digestive system	Fat digestion and absorption	2158	2512	3008	3798	1882	2402	5600	3388	3994	4228	4096	2660	39726
Metabolism	Lipid metabolism	Primary bile acid biosynthesis	2496	1924	4770	1700	3010	2828	3014	1970	1956	6482	5174	2956	38280
Genetic Information Processing	Replication and repair	Fanconi anemia pathway	1016	1864	1606	3478	2712	1436	7908	4578	4016	2174	2838	3624	37250
Metabolism	Biosynthesis of other secondary metabolites	Penicillin and cephalosporin biosynthesis	2254	2362	5334	2006	2080	2468	2510	2266	2334	5132	5958	2070	36774
Genetic Information Processing	Translation	Nucleocytoplasmic transport	1346	2170	1792	3580	1552	1710	6904	4488	3894	2574	3018	2702	35730
Genetic Information Processing	Translation	mRNA surveillance pathway	864	1600	2160	2640	1902	1210	6656	3078	2742	3068	3578	2728	32226
Cellular Processes	Cell growth and death	Apoptosis	2388	2516	2398	3970	1794	2910	3050	2590	3824	1784	2434	1754	31412
Cellular Processes	Transport and catabolism	Autophagy - yeast	942	1646	3558	2588	1136	1110	4170	1778	2448	4664	4786	1800	30626
Metabolism	Metabolism of terpenoids and polyketides	Carotenoid biosynthesis	2536	2756	2530	2060	3516	2910	984	2296	2350	3302	2662	2562	30464
Metabolism	Metabolism of terpenoids and polyketides	Geraniol degradation	1896	2062	1910	3528	1558	1478	5056	1890	2790	2856	2800	2424	30248
Cellular Processes	Cell growth and death	Meiosis - yeast	2146	3010	2124	4876	1668	2152	1580	1566	3778	1846	2098	1614	28458
Organismal Systems	Excretory system	Proximal tubule bicarbonate reclamation	2902	2278	2698	2084	2188	3080	1434	2202	2380	2238	2682	1838	28004
Human Diseases	Cancer: overview	Choline metabolism in cancer	1384	1786	1800	2564	1974	1468	2964	3406	3090	2366	2324	2108	27234
Environmental Information Processing	Signal transduction	FoxO signaling pathway	3314	2198	3330	1340	1782	3482	690	1714	1738	2156	3074	1292	26110
Human Diseases	Neurodegenerative disease	Prion disease	1390	1746	2318	2318	1280	1792	3438	1866	2226	2862	3062	1696	25994
Metabolism	Biosynthesis of other secondary metabolites	Biosynthesis of various other secondary metabolites	1358	1894	1884	2070	2032	1498	2330	1766	2118	3344	2506	1926	24726
Human Diseases	Infectious disease: bacterial	Shigellosis	3372	3072	1786	2370	1708	3264	638	1720	1998	1628	1594	940	24090
Metabolism	Metabolism of cofactors and vitamins	Retinol metabolism	1944	2152	1690	2954	1848	2238	1628	1258	2396	2044	2080	1654	23886
Metabolism	Lipid metabolism	Fatty acid elongation	410	1114	1846	2618	1520	426	4978	1168	1870	2778	2724	2386	23838
Human Diseases	Cancer: specific types	Renal cell carcinoma	1480	1664	2306	1934	1430	1386	2004	1028	1736	3568	2910	1528	22974
Human Diseases	Endocrine and metabolic disease	Cushing syndrome	1480	1664	2306	1934	1430	1386	2004	1028	1736	3568	2910	1528	22974
Human Diseases	Infectious disease: parasitic	African trypanosomiasis	1552	2350	772	3942	1600	1642	1506	2048	3328	920	952	1334	21946
Metabolism	Metabolism of terpenoids and polyketides	Nonribosomal peptide structures	1162	1608	1830	2270	1618	1418	1968	1654	2086	2296	2388	1628	21926
Metabolism	Xenobiotics biodegradation and metabolism	Atrazine degradation	1188	1004	1394	1366	2196	1284	2320	1814	1594	2454	1920	1984	20518
Metabolism	Xenobiotics biodegradation and metabolism	Chlorocyclohexane and chlorobenzene degradation	2338	2068	2022	1926	766	2380	664	1506	2166	1510	2080	696	20122
Metabolism	Glycan biosynthesis and metabolism	N-Glycan biosynthesis	1616	1490	1928	1860	676	1790	2462	1510	1966	1452	2026	1028	19804
Metabolism	Xenobiotics biodegradation and metabolism	Xylene degradation	1860	1492	1932	1268	1354	1852	1826	1450	1538	2008	1886	1300	19766
Genetic Information Processing	Replication and repair	Non-homologous end-joining	714	646	1526	784	1100	850	4890	1290	1106	2062	2508	1866	19342
Human Diseases	Endocrine and metabolic disease	Non-alcoholic fatty liver disease	1016	1324	1436	1366	916	1338	3094	1484	1388	1732	2100	1346	18540
Organismal Systems	Endocrine system	Oxytocin signaling pathway	548	948	936	1526	1276	658	3902	1670	1766	1434	1542	1866	18072
Human Diseases	Infectious disease: viral	Human T-cell leukemia virus 1 infection	1622	1652	1502	1202	1462	1918	1232	1402	1382	1270	1760	1380	17784
Organismal Systems	Aging	Longevity regulating pathway	2214	1716	1908	942	996	2338	194	1276	1278	1670	1832	754	17118
Metabolism	Biosynthesis of other secondary metabolites	Phenylpropanoid biosynthesis	1344	1058	1724	992	986	1396	1968	1326	1278	1730	1992	1186	16980
Metabolism	Xenobiotics biodegradation and metabolism	Dioxin degradation	1804	1404	1572	1178	1170	1762	1300	1288	1374	1416	1526	1056	16850
Cellular Processes	Cell growth and death	Apoptosis - fly	1722	1620	1632	1130	1310	1992	666	1020	1280	1192	1664	1140	16368
Human Diseases	Infectious disease: parasitic	Leishmaniasis	828	1620	606	2264	500	1022	2192	2174	2248	1034	976	884	16348
Organismal Systems	Digestive system	Protein digestion and absorption	2882	1132	1994	1436	1050	3052	62	208	1168	588	1348	1026	15946
Metabolism	Xenobiotics biodegradation and metabolism	Metabolism of xenobiotics by cytochrome P450	1452	1706	806	2198	868	1300	652	774	1684	1332	1042	774	14588
Human Diseases	Infectious disease: viral	Herpes simplex virus 1 infection	460	868	848	838	1240	736	2978	1018	910	1220	1456	1702	14274
Human Diseases	Infectious disease: viral	Measles	290	898	1150	1390	470	468	2628	920	1182	1574	1804	894	13668
Metabolism	Xenobiotics biodegradation and metabolism	Drug metabolism - cytochrome P450	1332	1560	802	1974	784	1100	652	726	1546	1310	1036	718	13540
Metabolism	Lipid metabolism	Biosynthesis of unsaturated fatty acids	1268	1206	820	2212	350	1254	710	1078	1808	1040	980	422	13148
Environmental Information Processing	Signal transduction	MAPK signaling pathway - fly	1506	988	1620	632	932	1474	146	960	934	1516	1552	690	12950
Human Diseases	Infectious disease: viral	Influenza A	320	694	1056	766	574	492	2574	910	810	1314	1656	940	12106
Human Diseases	Infectious disease: viral	Hepatitis C	308	688	1048	766	574	490	2574	910	810	1308	1650	940	12066
Organismal Systems	Digestive system	Cholesterol metabolism	1370	1136	1298	694	1048	1510	334	614	782	956	1306	886	11934
Environmental Information Processing	Signaling molecules and interaction	Neuroactive ligand-receptor interaction	1370	1136	1298	694	1048	1510	334	614	782	956	1306	886	11934
Human Diseases	Infectious disease: viral	Hepatitis B	282	568	960	612	1096	432	2402	614	636	1318	1568	1262	11750
Metabolism	Metabolism of terpenoids and polyketides	Biosynthesis of siderophore group nonribosomal peptides	2500	1290	848	1036	196	1708	220	1038	1054	420	732	236	11278
Cellular Processes	Cellular community - eukaryotes	Tight junction	198	284	1030	448	986	272	2400	614	524	1348	1658	1218	10980
Organismal Systems	Digestive system	Bile secretion	310	408	768	480	882	286	2880	416	470	1214	1504	1176	10794
Cellular Processes	Cell growth and death	Cell cycle	200	298	876	468	972	284	2412	618	558	1306	1502	1208	10702
Cellular Processes	Transport and catabolism	Autophagy - animal	198	362	938	600	552	296	2558	902	694	1030	1554	918	10602
Organismal Systems	Development and regeneration	Axon regeneration	564	564	1094	540	486	658	330	1980	924	1072	1276	452	9940
Metabolism	Lipid metabolism	Ether lipid metabolism	974	764	886	660	1032	1054	366	740	818	792	860	850	9796
Metabolism	Biosynthesis of other secondary metabolites	Betalain biosynthesis	212	124	1926	130	308	130	984	102	118	2832	2258	540	9664
Metabolism	Glycan biosynthesis and metabolism	Other types of O-glycan biosynthesis	1772	1442	554	558	124	1826	470	356	490	492	748	174	9006
Metabolism	Glycan biosynthesis and metabolism	Mannose type O-glycan biosynthesis	1704	1404	554	550	124	1786	470	280	450	492	748	174	8736
Organismal Systems	Immune system	Cytosolic DNA-sensing pathway	72	274	16	98	26	648	0	5498	1228	4	6	8	7878
Environmental Information Processing	Signal transduction	Phospholipase D signaling pathway	554	552	844	534	606	502	342	608	610	994	1020	518	7684
Organismal Systems	Circulatory system	Cardiac muscle contraction	766	664	516	564	408	948	530	572	548	732	582	440	7270
Metabolism	Glycan biosynthesis and metabolism	Glycosaminoglycan biosynthesis - heparan sulfate / heparin	24	24	294	40	3392	4	88	8	28	580	290	2058	6830
Human Diseases	Cancer: specific types	Hepatocellular carcinoma	618	472	372	462	658	522	1130	400	512	372	510	742	6770
Human Diseases	Immune disease	Systemic lupus erythematosus	438	474	566	118	1392	390	294	178	198	862	572	736	6218
Environmental Information Processing	Signal transduction	MAPK signaling pathway	90	528	612	720	142	306	76	1390	762	736	688	94	6144
Metabolism	Glycan biosynthesis and metabolism	Glycosaminoglycan biosynthesis - chondroitin sulfate / dermatan sulfate	2	2	34	4	3400	0	130	6	4	376	64	2090	6112
Environmental Information Processing	Signal transduction	Apelin signaling pathway	204	316	548	578	294	250	738	720	652	482	708	420	5910
Environmental Information Processing	Signal transduction	mTOR signaling pathway	164	302	542	580	294	198	738	710	662	478	698	420	5786
Human Diseases	Infectious disease: parasitic	Chagas disease	338	888	20	1756	16	296	240	446	1312	62	36	38	5448
Human Diseases	Drug resistance: antineoplastic	EGFR tyrosine kinase inhibitor resistance	152	292	388	578	294	182	738	706	652	428	536	416	5362
Metabolism	Biosynthesis of other secondary metabolites	Flavone and flavonol biosynthesis	938	632	246	512	106	1022	174	412	574	276	290	102	5284
Organismal Systems	Endocrine system	Parathyroid hormone synthesis, secretion and action	142	156	414	208	468	202	1016	306	296	616	600	520	4944
Metabolism	Lipid metabolism	alpha-Linolenic acid metabolism	888	544	446	492	84	612	74	376	518	108	378	70	4590
Environmental Information Processing	Signal transduction	MAPK signaling pathway - yeast	652	502	242	334	266	756	60	380	366	162	208	208	4136
Human Diseases	Infectious disease: viral	Kaposi sarcoma-associated herpesvirus infection	304	546	484	406	318	378	166	64	272	420	530	200	4088
Metabolism	Xenobiotics biodegradation and metabolism	Toluene degradation	604	436	200	508	70	396	192	430	492	372	204	106	4010
Genetic Information Processing	Information processing in viruses	Viral life cycle - HIV-1	602	616	110	948	146	448	50	124	664	52	100	82	3942
Human Diseases	Infectious disease: parasitic	Toxoplasmosis	102	546	418	790	24	184	70	22	488	628	470	32	3774
Cellular Processes	Transport and catabolism	Endocytosis	122	544	388	688	84	204	70	38	424	636	454	70	3722
Environmental Information Processing	Signal transduction	Sphingolipid signaling pathway	176	458	134	348	578	234	278	116	272	238	180	396	3408
Genetic Information Processing	Folding, sorting and degradation	Ubiquitin mediated proteolysis	222	276	398	276	184	224	178	80	216	388	466	150	3058
Human Diseases	Infectious disease: bacterial	Vibrio cholerae infection	90	130	146	110	740	88	246	160	124	324	232	572	2962
Genetic Information Processing	Transcription	Spliceosome	12	250	408	626	6	18	68	16	374	664	486	24	2952
Cellular Processes	Transport and catabolism	Mitophagy - animal	230	256	398	242	204	234	158	58	160	390	460	142	2932
Metabolism	Xenobiotics biodegradation and metabolism	Ethylbenzene degradation	568	378	58	338	20	396	74	232	330	60	62	22	2538
Metabolism	Xenobiotics biodegradation and metabolism	Fluorobenzoate degradation	568	396	8	452	8	346	0	300	376	8	8	8	2478
Metabolism	Lipid metabolism	Arachidonic acid metabolism	324	170	392	154	62	224	4	144	188	54	324	42	2082
Metabolism	Lipid metabolism	Linoleic acid metabolism	320	170	388	154	62	218	0	144	188	48	316	42	2050
Metabolism	Biosynthesis of other secondary metabolites	Flavonoid biosynthesis	286	66	578	8	42	350	2	12	46	58	410	36	1894
Metabolism	Biosynthesis of other secondary metabolites	Stilbenoid, diarylheptanoid and gingerol biosynthesis	286	66	578	8	42	350	2	12	46	58	410	36	1894
Organismal Systems	Immune system	RIG-I-like receptor signaling pathway	132	364	274	144	20	172	16	20	92	354	288	4	1880
Human Diseases	Infectious disease: viral	Human immunodeficiency virus 1 infection	164	448	86	268	138	252	10	10	190	34	74	70	1744
Human Diseases	Cancer: overview	Chemical carcinogenesis - DNA adducts	432	208	14	180	14	264	44	160	218	12	20	10	1576
Metabolism	Lipid metabolism	Steroid hormone biosynthesis	300	84	320	34	16	400	10	0	36	80	252	14	1546
Cellular Processes	Transport and catabolism	Phagosome	94	118	116	108	90	82	264	150	118	96	150	142	1528
Human Diseases	Cancer: specific types	Bladder cancer	234	186	76	190	132	144	18	148	172	52	110	64	1526
Human Diseases	Infectious disease: viral	Human cytomegalovirus infection	96	304	86	164	138	168	10	10	116	34	74	70	1270
Metabolism	Metabolism of terpenoids and polyketides	Sesquiterpenoid and triterpenoid biosynthesis	226	328	10	68	84	206	2	126	104	6	6	58	1224
Organismal Systems	Nervous system	Retrograde endocannabinoid signaling	124	124	74	50	100	176	92	98	98	104	68	116	1224
Cellular Processes	Cell growth and death	Cellular senescence	78	276	58	78	126	146	20	4	52	54	76	70	1038
Organismal Systems	Immune system	C-type lectin receptor signaling pathway	106	300	0	90	20	156	8	184	132	4	2	12	1014
Organismal Systems	Endocrine system	Relaxin signaling pathway	120	296	52	78	112	160	0	0	50	30	58	54	1010
Metabolism	Glycan biosynthesis and metabolism	Lipoarabinomannan (LAM) biosynthesis	92	104	66	170	0	82	140	14	110	48	94	62	982
Organismal Systems	Endocrine system	Renin-angiotensin system	116	30	224	8	70	118	48	32	48	68	148	68	978
Human Diseases	Cancer: specific types	Small cell lung cancer	94	296	46	166	20	166	2	12	118	4	30	10	964
Organismal Systems	Immune system	T cell receptor signaling pathway	76	274	52	78	126	136	8	4	52	34	58	64	962
Organismal Systems	Immune system	B cell receptor signaling pathway	76	274	52	78	126	136	8	4	52	34	58	64	962
Human Diseases	Cancer: overview	PD-L1 expression and PD-1 checkpoint pathway in cancer	76	274	52	78	126	136	8	4	52	34	58	64	962
Organismal Systems	Development and regeneration	Osteoclast differentiation	76	274	52	78	126	136	8	4	52	34	58	64	962
Organismal Systems	Nervous system	Neurotrophin signaling pathway	72	266	52	80	112	138	0	0	60	30	58	54	922
Human Diseases	Infectious disease: viral	Epstein-Barr virus infection	90	296	34	164	18	166	2	6	114	0	16	8	914
Environmental Information Processing	Signal transduction	cAMP signaling pathway	70	266	52	78	112	134	0	0	50	30	58	54	904
Organismal Systems	Immune system	Toll-like receptor signaling pathway	70	266	52	78	112	134	0	0	50	30	58	54	904
Human Diseases	Cancer: specific types	Acute myeloid leukemia	70	266	52	78	112	134	0	0	50	30	58	54	904
Human Diseases	Cancer: specific types	Chronic myeloid leukemia	70	266	52	78	112	134	0	0	50	30	58	54	904
Environmental Information Processing	Signal transduction	TNF signaling pathway	70	266	52	78	112	134	0	0	50	30	58	54	904
Environmental Information Processing	Signal transduction	Ras signaling pathway	70	266	52	78	112	134	0	0	50	30	58	54	904
Organismal Systems	Immune system	Chemokine signaling pathway	70	266	52	78	112	134	0	0	50	30	58	54	904
Organismal Systems	Immune system	Neutrophil extracellular trap formation	70	266	52	78	112	134	0	0	50	30	58	54	904
Human Diseases	Cancer: specific types	Pancreatic cancer	70	266	52	78	112	134	0	0	50	30	58	54	904
Human Diseases	Cancer: specific types	Gastric cancer	8	12	112	10	280	2	32	16	8	106	84	202	872
Human Diseases	Endocrine and metabolic disease	AGE-RAGE signaling pathway in diabetic complications	124	296	16	80	8	160	0	6	54	2	24	4	774
Metabolism	Metabolism of terpenoids and polyketides	Biosynthesis of type II polyketide products	72	114	28	108	26	74	10	100	110	58	26	14	740
Metabolism	Lipid metabolism	Steroid biosynthesis	76	198	0	66	6	110	0	118	100	0	0	0	674
Organismal Systems	Immune system	Th1 and Th2 cell differentiation	76	274	0	78	20	136	8	4	52	4	0	12	664
Cellular Processes	Transport and catabolism	Mitophagy - yeast	72	102	4	92	30	88	10	82	108	22	10	22	642
Human Diseases	Cancer: overview	Transcriptional misregulation in cancer	74	266	4	78	8	140	2	0	50	6	8	4	640
Organismal Systems	Sensory system	Taste transduction	12	38	16	2	140	56	76	22	10	54	18	166	610
Organismal Systems	Immune system	Toll and Imd signaling pathway	70	266	0	78	6	134	0	0	50	0	0	2	606
Human Diseases	Substance dependence	Cocaine addiction	70	266	0	78	6	134	0	0	50	0	0	2	606
Human Diseases	Cancer: specific types	Colorectal cancer	20	30	86	86	118	32	2	6	64	30	74	58	606
Human Diseases	Immune disease	Inflammatory bowel disease	70	266	0	78	6	134	0	0	50	0	0	2	606
Environmental Information Processing	Signal transduction	NF-kappa B signaling pathway	70	266	0	78	6	134	0	0	50	0	0	2	606
Human Diseases	Cardiovascular disease	Hypertrophic cardiomyopathy	76	34	156	0	0	84	0	14	0	52	162	4	582
Human Diseases	Cancer: specific types	Glioma	0	10	64	8	182	2	74	0	10	48	76	106	580
Environmental Information Processing	Signal transduction	cGMP-PKG signaling pathway	52	22	54	0	120	68	8	14	2	36	58	62	496
Environmental Information Processing	Signal transduction	Calcium signaling pathway	52	32	14	8	90	70	82	14	12	24	18	64	480
Cellular Processes	Cellular community - eukaryotes	Focal adhesion	32	16	64	32	108	24	0	8	12	34	72	54	456
Cellular Processes	Cell growth and death	Oocyte meiosis	8	28	52	20	120	6	8	6	28	34	58	62	430
Organismal Systems	Environmental adaptation	Circadian rhythm	6	10	154	0	0	2	0	4	0	50	162	4	392
Cellular Processes	Cell growth and death	p53 signaling pathway	22	32	40	86	12	42	14	6	64	20	34	12	384
Metabolism	Xenobiotics biodegradation and metabolism	Steroid degradation	12	10	40	8	50	26	22	58	24	34	52	42	378
Organismal Systems	Nervous system	Long-term potentiation	8	8	52	2	120	6	8	4	12	34	58	62	374
Organismal Systems	Nervous system	Cholinergic synapse	12	16	52	2	106	16	0	16	14	30	58	52	374
Genetic Information Processing	Information processing in viruses	Viral replication	0	0	130	0	6	0	0	0	0	156	76	2	370
Human Diseases	Cancer: specific types	Breast cancer	0	0	92	0	112	0	0	0	0	36	70	54	364
Organismal Systems	Immune system	Natural killer cell mediated cytotoxicity	6	8	52	0	120	2	8	4	2	34	58	62	356
Environmental Information Processing	Signal transduction	VEGF signaling pathway	6	8	52	0	120	2	8	4	2	34	58	62	356
Cellular Processes	Cell motility	Regulation of actin cytoskeleton	4	0	64	2	108	0	0	6	4	30	72	54	344
Metabolism	Metabolism of terpenoids and polyketides	Tetracycline biosynthesis	56	0	110	0	30	42	0	0	0	8	58	34	338
Cellular Processes	Cellular community - eukaryotes	Signaling pathways regulating pluripotency of stem cells	0	0	52	0	116	0	0	0	0	44	62	56	330
Cellular Processes	Cell growth and death	Apoptosis - multiple species	26	30	34	86	12	36	2	6	64	0	16	6	318
Human Diseases	Cardiovascular disease	Viral myocarditis	20	30	34	86	12	32	2	6	64	0	16	6	308
Organismal Systems	Development and regeneration	Dorso-ventral axis formation	0	0	52	0	108	0	2	0	0	30	58	54	304
Organismal Systems	Immune system	Fc epsilon RI signaling pathway	0	0	52	0	106	0	0	0	0	30	58	52	298
Environmental Information Processing	Signal transduction	ErbB signaling pathway	0	0	52	0	106	0	0	0	0	30	58	52	298
Human Diseases	Substance dependence	Alcoholism	0	0	52	0	106	0	0	0	0	30	58	52	298
Human Diseases	Cancer: specific types	Endometrial cancer	0	0	52	0	106	0	0	0	0	30	58	52	298
Organismal Systems	Endocrine system	Melanogenesis	0	0	52	0	106	0	0	0	0	30	58	52	298
Organismal Systems	Nervous system	Serotonergic synapse	0	0	52	0	106	0	0	0	0	30	58	52	298
Organismal Systems	Immune system	Fc gamma R-mediated phagocytosis	0	0	52	0	106	0	0	0	0	30	58	52	298
Organismal Systems	Endocrine system	GnRH signaling pathway	0	0	52	0	106	0	0	0	0	30	58	52	298
Organismal Systems	Nervous system	Long-term depression	0	0	52	0	106	0	0	0	0	30	58	52	298
Organismal Systems	Endocrine system	Growth hormone synthesis, secretion and action	0	0	52	0	106	0	0	0	0	30	58	52	298
Organismal Systems	Endocrine system	GnRH secretion	0	0	52	0	106	0	0	0	0	30	58	52	298
Cellular Processes	Cellular community - eukaryotes	Gap junction	0	0	52	0	106	0	0	0	0	30	58	52	298
Organismal Systems	Circulatory system	Vascular smooth muscle contraction	0	0	52	0	106	0	0	0	0	30	58	52	298
Environmental Information Processing	Signal transduction	Rap1 signaling pathway	0	0	52	0	106	0	0	0	0	30	58	52	298
Human Diseases	Cancer: specific types	Non-small cell lung cancer	0	0	52	0	106	0	0	0	0	30	58	52	298
Human Diseases	Cancer: specific types	Thyroid cancer	0	0	52	0	106	0	0	0	0	30	58	52	298
Human Diseases	Drug resistance: antineoplastic	Endocrine resistance	0	0	52	0	106	0	0	0	0	30	58	52	298
Human Diseases	Cancer: specific types	Melanoma	0	0	52	0	106	0	0	0	0	30	58	52	298
Organismal Systems	Endocrine system	Aldosterone synthesis and secretion	0	10	12	8	76	2	74	0	10	18	18	54	282
Cellular Processes	Cellular community - eukaryotes	Adherens junction	10	2	22	0	16	10	110	20	26	6	10	44	276
Organismal Systems	Endocrine system	Renin secretion	32	26	0	16	14	26	8	68	30	4	0	10	234
Cellular Processes	Cell growth and death	Cell cycle - yeast	24	40	2	20	0	24	12	20	40	18	8	6	214
Environmental Information Processing	Signal transduction	Hippo signaling pathway - multiple species	0	18	26	58	2	0	2	0	44	2	18	2	172
Environmental Information Processing	Signaling molecules and interaction	ECM-receptor interaction	32	16	12	32	2	24	0	8	12	4	14	2	158
Human Diseases	Cardiovascular disease	Arrhythmogenic right ventricular cardiomyopathy	46	14	2	0	0	66	0	10	0	2	0	0	140
Organismal Systems	Sensory system	Olfactory transduction	46	14	2	0	0	66	0	10	0	2	0	0	140
Organismal Systems	Circulatory system	Adrenergic signaling in cardiomyocytes	46	14	2	0	0	66	0	10	0	2	0	0	140
Human Diseases	Cardiovascular disease	Dilated cardiomyopathy	46	14	2	0	0	66	0	10	0	2	0	0	140
Organismal Systems	Excretory system	Endocrine and other factor-regulated calcium reabsorption	46	14	2	0	0	66	0	10	0	2	0	0	140
Environmental Information Processing	Signal transduction	Wnt signaling pathway	6	8	40	0	20	2	8	4	2	10	12	12	124
Environmental Information Processing	Signal transduction	Hippo signaling pathway - fly	0	18	0	58	0	0	0	0	44	0	0	0	120
Organismal Systems	Immune system	Complement and coagulation cascades	28	18	20	2	0	24	0	2	0	8	10	0	112
Metabolism	Metabolism of terpenoids and polyketides	Biosynthesis of enediyne antibiotics	0	0	12	0	4	2	52	0	0	16	18	6	110
Organismal Systems	Immune system	Platelet activation	50	30	0	0	0	26	0	0	0	0	0	0	106
Metabolism	Xenobiotics biodegradation and metabolism	Furfural degradation	0	2	0	2	2	20	2	30	22	0	4	6	90
Environmental Information Processing	Signal transduction	Plant hormone signal transduction	14	6	10	24	0	0	0	4	12	8	8	0	86
Environmental Information Processing	Signal transduction	Hedgehog signaling pathway - fly	10	0	40	0	6	2	0	0	0	6	12	2	78
Metabolism	Metabolism of terpenoids and polyketides	Type I polyketide structures	0	0	34	0	0	0	0	0	0	10	24	0	68
Environmental Information Processing	Signal transduction	Hedgehog signaling pathway	0	0	40	0	6	0	0	0	0	6	12	2	66
Organismal Systems	Nervous system	Synaptic vesicle cycle	0	0	0	4	0	4	18	6	6	2	8	14	62
Organismal Systems	Development and regeneration	Axon guidance	6	8	0	0	14	2	8	4	2	4	0	10	58
Human Diseases	Substance dependence	Amphetamine addiction	6	8	0	0	14	2	8	4	2	4	0	10	58
Organismal Systems	Nervous system	Dopaminergic synapse	6	8	0	0	14	2	8	4	2	4	0	10	58
Organismal Systems	Digestive system	Vitamin digestion and absorption	0	0	28	0	4	0	0	0	0	4	20	0	56
Environmental Information Processing	Signaling molecules and interaction	Cell adhesion molecules	6	4	0	0	2	4	4	6	4	2	0	4	36
Metabolism	Lipid metabolism	Cutin, suberine and wax biosynthesis	4	4	0	6	4	2	4	0	8	2	0	2	36
Metabolism	Energy metabolism	Photosynthesis - antenna proteins	0	10	0	0	0	6	0	0	0	0	0	0	16
Environmental Information Processing	Signal transduction	Hippo signaling pathway	0	0	4	0	0	0	0	0	0	2	10	0	16
Cellular Processes	Transport and catabolism	Autophagy - other	4	0	0	0	0	10	0	0	0	0	0	0	14
Metabolism	Xenobiotics biodegradation and metabolism	Polycyclic aromatic hydrocarbon degradation	0	0	0	0	0	0	0	0	0	2	0	8	10
Organismal Systems	Endocrine system	Regulation of lipolysis in adipocytes	0	4	0	2	0	0	0	0	2	0	0	0	8
Metabolism	Glycan biosynthesis and metabolism	Glycosylphosphatidylinositol (GPI)-anchor biosynthesis	8	0	0	0	0	0	0	0	0	0	0	0	8
Environmental Information Processing	Signal transduction	Notch signaling pathway	0	0	0	0	0	0	0	0	0	0	0	6	6
Metabolism	Biosynthesis of other secondary metabolites	Caffeine metabolism	0	2	0	0	0	0	0	2	0	0	0	0	4
Genetic Information Processing	Information processing in viruses	Virion - Herpesvirus	0	0	0	0	2	0	2	0	0	0	0	0	4
