# Supplementary material for: Functional analysis of microorganisms and metabolites in the cecum of different sheep populations and their effects on production traits
Source: Front Microbiol. 2024 Sep 16;15:1437250. doi: 10.3389/fmicb.2024.1437250 (PMC11439670; doi:10.3389/fmicb.2024.1437250)
Supplement: SUPPLEMENTARY TABLE S11 — Annotation and classification of metabolites. [file Table_11.xlsx]

## Sheet: HmdbSuperclass
Superclass	Number	Metab_ids	Metabolite
Lipids and lipid-like molecules	202	metab_357;metab_422;metab_582;metab_596;metab_650;metab_693;metab_697;metab_707;metab_724;metab_738;metab_739;metab_748;metab_773;metab_786;metab_799;metab_801;metab_810;metab_822;metab_843;metab_855;metab_911;metab_951;metab_965;metab_989;metab_1003;metab_1017;metab_1030;metab_1089;metab_1093;metab_1108;metab_1111;metab_1177;metab_1183;metab_1193;metab_1267;metab_1364;metab_1366;metab_1382;metab…	Arenobufagin;S-(2-Methylbutanoyl)-dihydrolipoamide;N5-Hexanoylspermidine;Octanoate;7-Hexadecynoic acid;8-Amino-7-oxononanoic acid;8'-hydroxyabscisate;(2xi,6xi)-7-Methyl-3-methylene-1,2,6,7-octanetetrol;Tanacetol B;3-(1-Hydroxymethyl-1-propenyl)pentanedioic acid;7Z,10Z-Hexadecadienoic acid;1-Undecanol;Pantothenol;Lexacalcitol;5-((6-((Aminomethyl)amino)-1-oxohexyl)amino)pentanoic acid;Glycerylphosp…
Organic acids and derivatives	165	metab_4;metab_7;metab_48;metab_72;metab_123;metab_124;metab_137;metab_158;metab_256;metab_292;metab_323;metab_421;metab_496;metab_515;metab_522;metab_528;metab_533;metab_534;metab_543;metab_548;metab_564;metab_586;metab_599;metab_608;metab_651;metab_660;metab_708;metab_715;metab_722;metab_780;metab_782;metab_808;metab_846;metab_878;metab_900;metab_919;metab_933;metab_964;metab_1113;metab_1121;met…	Galactosyl 4-hydroxyproline;Gamma-Glutamylproline;Indole-3-acetyl-phenylalanine;N-a-Acetyl-L-arginine;Gamma-Glutamylalanine;L-3-(3-Hydroxy-4-pivaloyloxyphenyl)alanine;Leucyl-Threonine;L-Pyridosine;Arginylglutamine;5-Aminopentanoic acid;Histidylvaline;Methionine sulfoxide;Threonylproline;Norvaline;Valylvaline;Glucitol-lysine;Etiracetam;Glutamylphenylalanine;Tert-Butyl (2-(2-hydroxyethoxy)ethyl)car…
Organoheterocyclic compounds	127	metab_222;metab_349;metab_459;metab_469;metab_472;metab_527;metab_536;metab_572;metab_590;metab_595;metab_614;metab_747;metab_757;metab_762;metab_783;metab_795;metab_803;metab_850;metab_1022;metab_1146;metab_1303;metab_1347;metab_1362;metab_1422;metab_2208;metab_2686;metab_2783;metab_2843;metab_2885;metab_2896;metab_2958;metab_2989;metab_3002;metab_3014;metab_3049;metab_3233;metab_3243;metab_3244…	3'-Hydroxyamobarbital;Pyridoxal;Indoleacetaldehyde;Niacinamide;Castanospermine;Fusaric Acid;Maltol;Leptin F;4-Deoxypyridoxine;4-Amino-2,2,6,6-tetramethylpiperidin-1-ol;Alpha-Methyltryptamine;Methylphenobarbital;D-Threo biopterin;1,2-Disehydronorcoclaurine;N-Acetylserotonin;Dimethylbenzimidazole;Levomefolic acid;4-Imidazolone-5-propionic acid;6-Hydroxy-5-methoxy-1h-indole-2-carboxylic acid;4R-Hydr…
Benzenoids	89	metab_371;metab_623;metab_625;metab_635;metab_678;metab_713;metab_728;metab_789;metab_796;metab_834;metab_836;metab_952;metab_1014;metab_1095;metab_1160;metab_2743;metab_2775;metab_2928;metab_2986;metab_3039;metab_3052;metab_3086;metab_3113;metab_3242;metab_3261;metab_3357;metab_3365;metab_3373;metab_3561;metab_3605;metab_3608;metab_3652;metab_3660;metab_3757;metab_3767;metab_3859;metab_3920;meta…	Desglymidodrine;Procaine;Pyricarbate;Coniferyl acetate;Epanolol;Cladosporin;Kukoamine D;Naloxazone;1,2-Dihydroxy-3,4-epoxy-1,2,3,4-tetrahydronaphthalene;Mdpbp;4-(Phenylamino)benzoic acid;Enol-phenylpyruvate;Aniracetam;Magnolol;Ritodrina;Phenylpyruvic acid;1,2-Dihydronaphthalene-1,2-diol;3-Polyprenyl-4,5-dihydroxybenzoate;Ritodrine;2-Methoxy-5-Methylaniline;Phenacetin;Metipranolol;2-(Hydroxymethyl…
Phenylpropanoids and polyketides	85	metab_189;metab_606;metab_785;metab_824;metab_844;metab_861;metab_888;metab_945;metab_967;metab_980;metab_1036;metab_1181;metab_1543;metab_2847;metab_2850;metab_2853;metab_2877;metab_2915;metab_2951;metab_2991;metab_2992;metab_3038;metab_3042;metab_3046;metab_3084;metab_3380;metab_3703;metab_3815;metab_3883;metab_4036;metab_4040;metab_4139;metab_4579;metab_5084;metab_5693;metab_6496;metab_6565;me…	(R)-2-Feruloyl-1-(4-Hydroxyphenyl)-1,2-ethanediol;(Z)-7-Hexadecen-1,16-olide;Subaphylline;3-(2-Hydroxyphenyl)propanoic acid;Neosaxitoxin;1-Dehydro-[6]-gingerdione;Cis-p-Coumaric acid;Hesperetin;Hydroxyphenyllactic acid;Trans-cinnamoyl-beta-D-glucoside;Mollicellin C;Homoeriodictyol;Betagarin;Lucidenic acid M;Luteolin;Annocherin A;Styraxlignolide A;Trans-Piceid;Salvianolic acid A;3,4-Flavandione;(+…
Organic oxygen compounds	46	metab_38;metab_65;metab_849;metab_857;metab_974;metab_1173;metab_2645;metab_2943;metab_3118;metab_3311;metab_3377;metab_3405;metab_3410;metab_3437;metab_3645;metab_3832;metab_4011;metab_4984;metab_5087;metab_5973;metab_6040;metab_6156;metab_6359;metab_6441;metab_6611;metab_6660;metab_6691;metab_6749;metab_7079;metab_8108;metab_8348;metab_9050;metab_9122;metab_9430;metab_9842;metab_10117;metab_103…	Acetophenone;Hydroxykynurenine;3H-Dopamine;Dopamine quinone;Convicine;Jasmolone;Lactulose;Propofol glucuronide;Piperdial;Salicylamide glucuronide;D-Quinovose;Arabinogalactose;4-(2-Aminophenyl)-2,4-dioxobutanoic acid;D-Kynurenine;Lotaustralin;N-Acetylmuramate;Glucose propionate;Beta-D-Xylopyranosyl-(1->5)-alpha-L-arabinofuranosyl-(1->5)-L-arabinose;Gluconolactone;Lacto-N-difucohexaose;3-Hydroxyben…
Nucleosides, nucleotides, and analogues	16	metab_339;metab_749;metab_853;metab_870;metab_913;metab_1565;metab_3117;metab_3269;metab_3362;metab_3364;metab_3584;metab_3991;metab_6226;metab_6233;metab_6257;metab_10355	5-Methylcytidine;2,6-Diaminopurine 2',3'-dideoxyriboside;5'-Deoxy-5-fluorocytidine;Gemcitabine;Cotinine glucuronide;1-Methylinosine;8-Aminoguanosine;Adenosine, 8-(butylamino)-N-cyclopentyl-;Inosine,2',3'-dideoxy-;M1G-dR;N6-Methyl-2'-deoxyadenosine;Cytosine deoxyribonucleoside;Taribavirin;5'-o-Methylthymidine;5-Taurinomethyl-2-thiouridine;Metacavir
Alkaloids and derivatives	13	metab_778;metab_1087;metab_3228;metab_3232;metab_3429;metab_3849;metab_3967;metab_5062;metab_6576;metab_6812;metab_6928;metab_9169;metab_10086	Lupinine;Codeine;Dialdehyde;Isoline;Heliotridine;Ecgonine;Calystegine B2;Irinotecan;Arecoline;Amabiline;Trigonelline;7-Acetyllycopsamine;Morphine-6-glucuronide
Unknow	10	metab_1130;metab_1225;metab_2031;metab_2069;metab_2073;metab_2720;metab_2879;metab_3166;metab_7901;metab_8785	PA(18:3(10,12,15)-OH(9)/2:0);Deoxycholyl-L-dopa;MPPa (Methyl pyropheophorbide-a);Pyropheophorbide a;Pheophorbide a;MG(PGE2/0:0/0:0);DG(20:3(8Z,11Z,14Z)-2OH(5,6)/0:0/2:0);Hydroxyvalerylcarnitine;Methyl phaeophorbide b;PA(22:6(5Z,8E,10Z,13Z,15E,19Z)-2OH(7S, 17S)/8:0)
Organic nitrogen compounds	10	metab_257;metab_563;metab_2511;metab_2698;metab_3102;metab_3999;metab_4202;metab_4363;metab_6987;metab_9183	Dimethylethanolamine;Diethanolamine;Sphinganine;Phytosphingosine;4-Trimethylaminobutyraldehyde;2-Methylpropanamine;Trimethylamine N-Oxide;Histamine;Methylphenidate;(4-((5,6-Diphenylpyrazin-2-yl)(isopropyl)amino)butoxy)acetic acid
Hydrocarbon derivatives	2	metab_3192;metab_6602	Tropolone;Tropolone A
Lignans, neolignans and related compounds	2	metab_6386;metab_11808	4'-Demethylepipodophyllotoxin;Enterodiol
Organophosphorus compounds	1	metab_6579	Ethoprophos
